# Supplementary material for: The Identification and Analysis of Long-Range Aerosol Transport Pathways with Layered Cloud-Aerosol Lidar with Orthogonal Polarization Datasets from 2006 to 2016
Source: MDPI journal article supplement (doi:10.3390/rs15184537), 2023-09-15
Supplement: s1 [file s1]

Archive with 1 entries (1 files):
- remotesensing-2517867-supplementary.pdf
