# Supplementary material for: The Identification and Analysis of Long-Range Aerosol Transport Pathways with Layered Cloud-Aerosol Lidar with Orthogonal Polarization Datasets from 2006 to 2016
Source: MDPI journal article supplement (doi:10.3390/rs15184537), 2023-09-15
Supplement: s1 [file s1 › remotesensing-2517867-supplementary.pdf]

# The Identification and Analysis of Long-Range Aerosol Transport Pathways with Layered Cloud-Aerosol Lidar with Orthogonal Polarization Datasets from 2006 to 2016

Lingyu Wang <sup>1,2,3</sup>, Wensheng Wang <sup>1,2</sup>, Baolei Lyu <sup>4,5,6,\*</sup>, Jinghua Zhang <sup>1,2</sup>, Yilun Han <sup>3</sup>, Yuqi Bai <sup>3</sup> and Zhi Guo <sup>1,2</sup>

<sup>1</sup> Key Laboratory of Network Information System Technology (NIST), Institute of Electronics, Chinese Academy of Sciences, Beijing 100190, China

<sup>2</sup> The Aerospace Information Research Institute, Chinese Academy of Sciences, Beijing 100094, China

<sup>3</sup> Department of Earth System Science, Ministry of Education Key Laboratory for Earth System Modeling, Institute for Global Change Studies, Tsinghua University, Beijing 100084, China

<sup>4</sup> Huayun Sounding Meteorology Technology Corporation, Beijing 100081, China

<sup>5</sup> Jiangsu Collaborative Innovation Center of Atmospheric Environment and Equipment Technology (CICAEET), Nanjing University of Information Science & Technology, Nanjing 210044, China

<sup>6</sup> China Meteorological Administration Xiong'an Atmospheric Boundary Layer Key Laboratory, Xiong'an 071000, China

\* Correspondence: lvbaolei@hysdqx.com

## Contents of this file

Tables S1 to S4

Figures S1 to S12

Pages S1 to S17

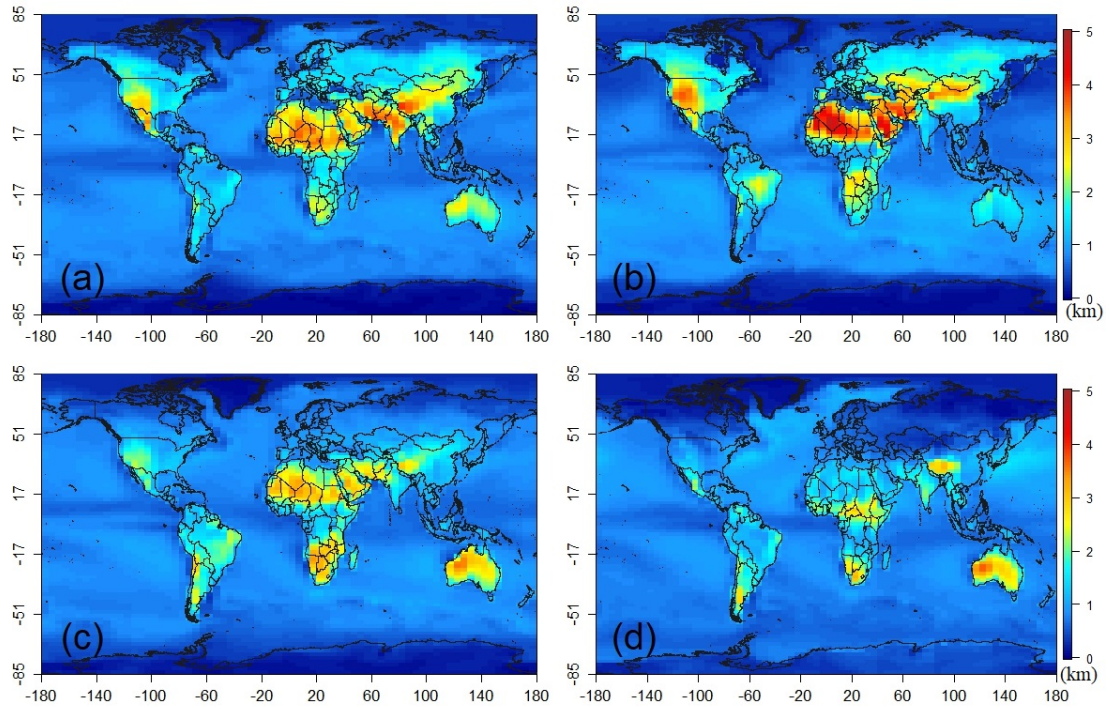

**Figure S1.** Planetary boundary layer height (PBLH) on the global scale: (a-d) the PBLH values in MAM (March-April-May), JJA (June-July-August), SON (September-October-November) and DJF (December-January-February).

**Table S1.** The ratios of air mass forward trajectories in each cluster on a seasonal scale (the North China Plain)

| clusters | MAM   | JJA    | SON    | DJF   |
|----------|-------|--------|--------|-------|
| 1        | 36.4% | 17%    | 27.3%  | 19.3% |
| 2        | 20.3% | 29.45% | 26.25% | 24.0% |
| 3        | 37.7% | 14.6%  | 24.5%  | 23.2% |

**Table S2.** The ratios of air mass forward trajectories in each cluster on a seasonal scale (the Taklimakan Desert)

| clusters | MAM   | JJA   | SON   | DJF   |
|----------|-------|-------|-------|-------|
| 1        | 20%   | 27.7% | 20.4% | 31.9% |
| 2        | 38.9% | 9.6%  | 37.1% | 14.4% |
| 3        | 24.3% | 24.1% | 26.4% | 25.2% |

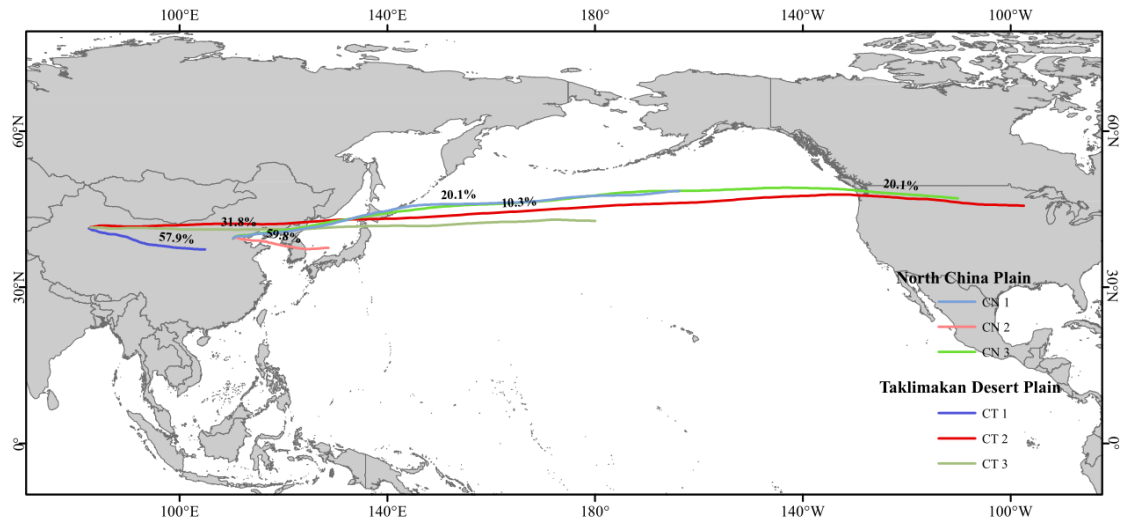

**Figure S2.** 11-day air mass forward trajectory clusters originating from the North China Plain and the Taklimakan Desert (starting at 500 m AGL).

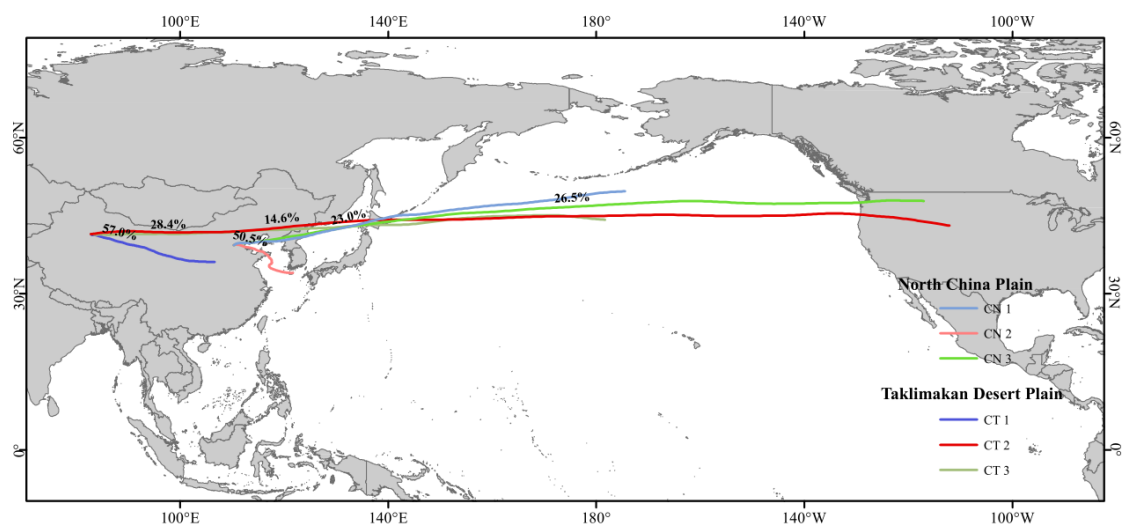

**Figure S3.** 11-day air mass forward trajectory clusters originating from the North China Plain and the Taklimakan Desert (starting at 1000 m AGL).

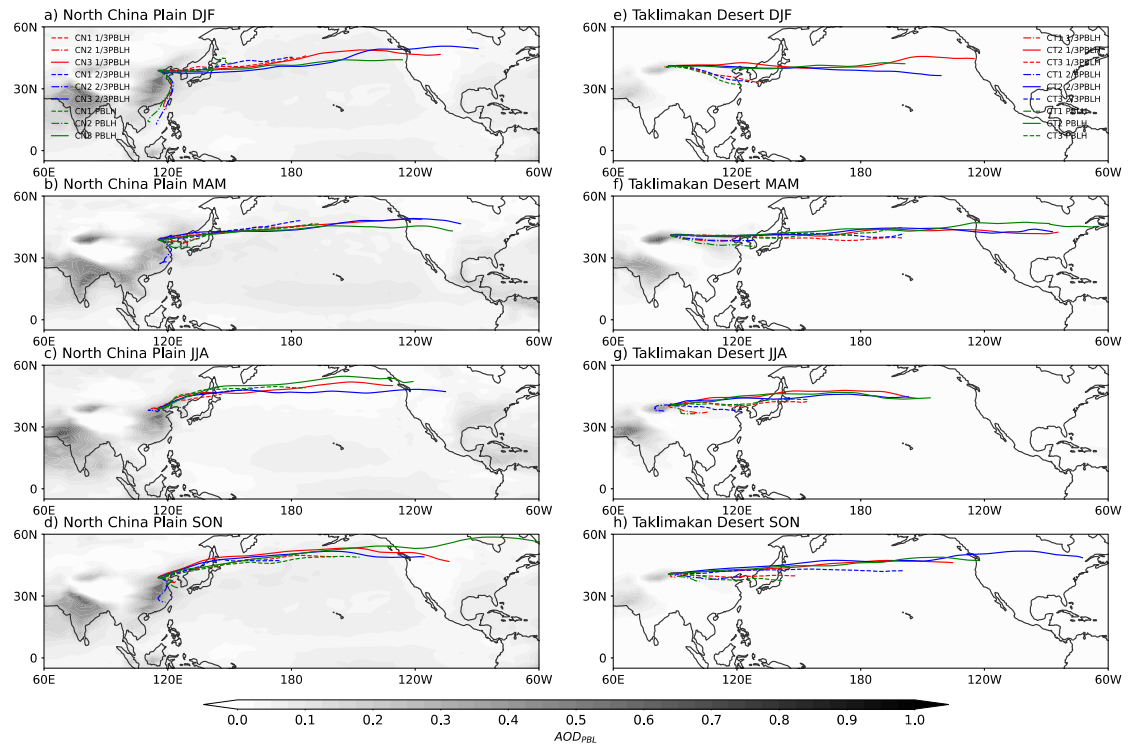

**Figure S4.** 11-day air mass forward trajectory clusters originating from the North China Plain (a-d) and the Taklimakan Desert (e-h). Started levels are at 1/3PBLH, 2/3PBLH, and PBLH in the air mass forward trajectories calculation. The shades (a-d) are the  $AOD_{PBL}$  values of total aerosols, while the shades (e-h) are the  $AOD_{PBL}$  values of dust aerosols.

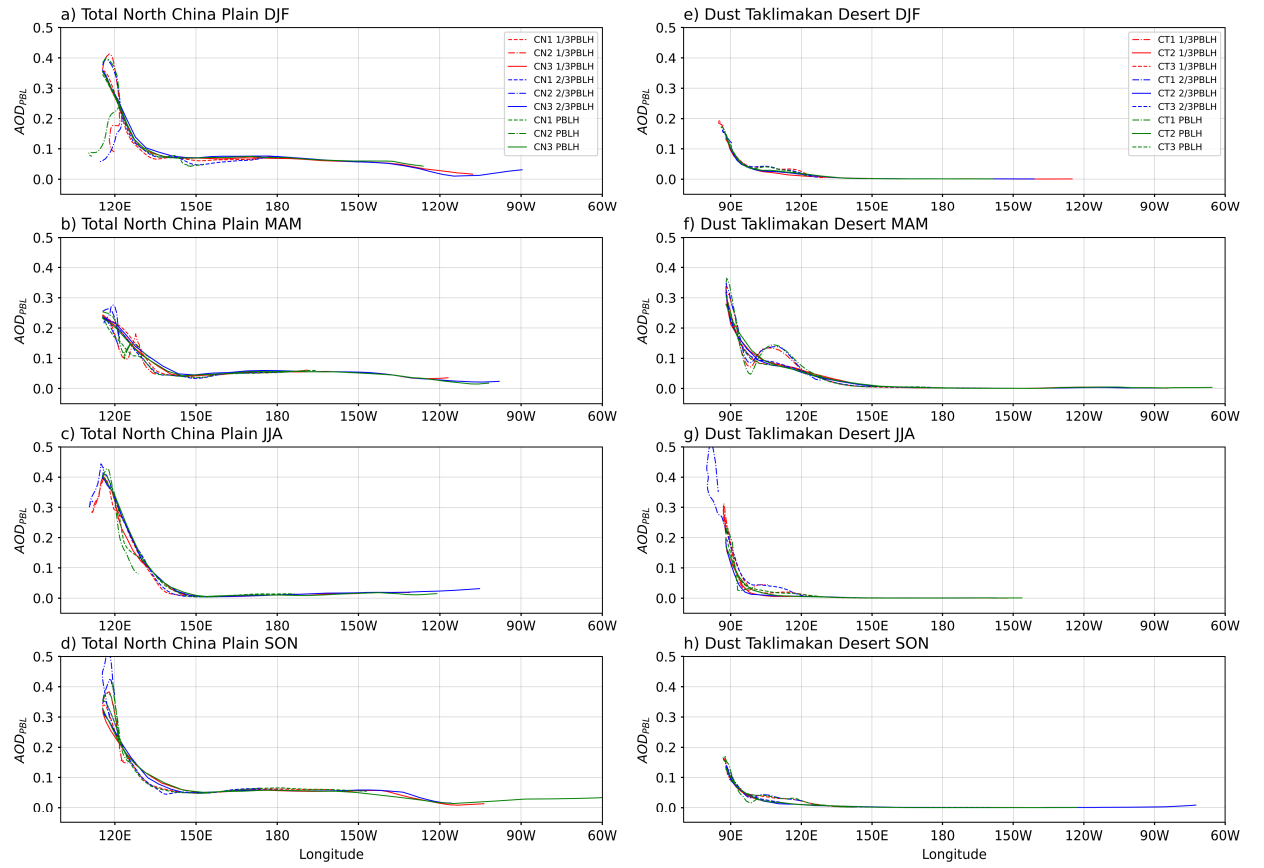

**Figure S5.**  $AOD_{PBL}$  values of total aerosols along air mass forward trajectory clusters originating from the North China Plain (a-d), and  $AOD_{PBL}$  values of dust aerosols along air mass forward trajectory clusters originating from the Taklimakan Desert (e-h). Started levels are at 1/3PBLH, 2/3PBLH, and PBLH in the air mass forward trajectories calculation.

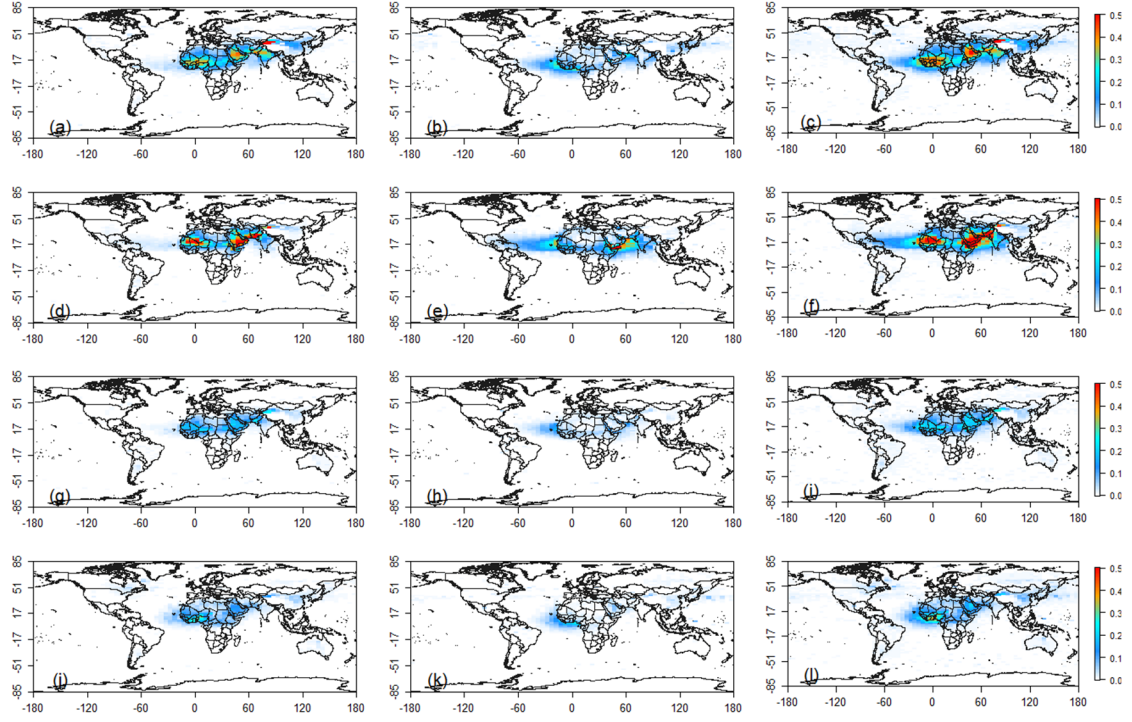

**Figure S6.** Seasonal layered AOD values for dust. The four rows represent four seasons, which are MAM, JJA, SON, and DJF. The three columns are for AOD<sub>PBL</sub>, AOD<sub>FTL</sub>, and AOD<sub>TA</sub>.

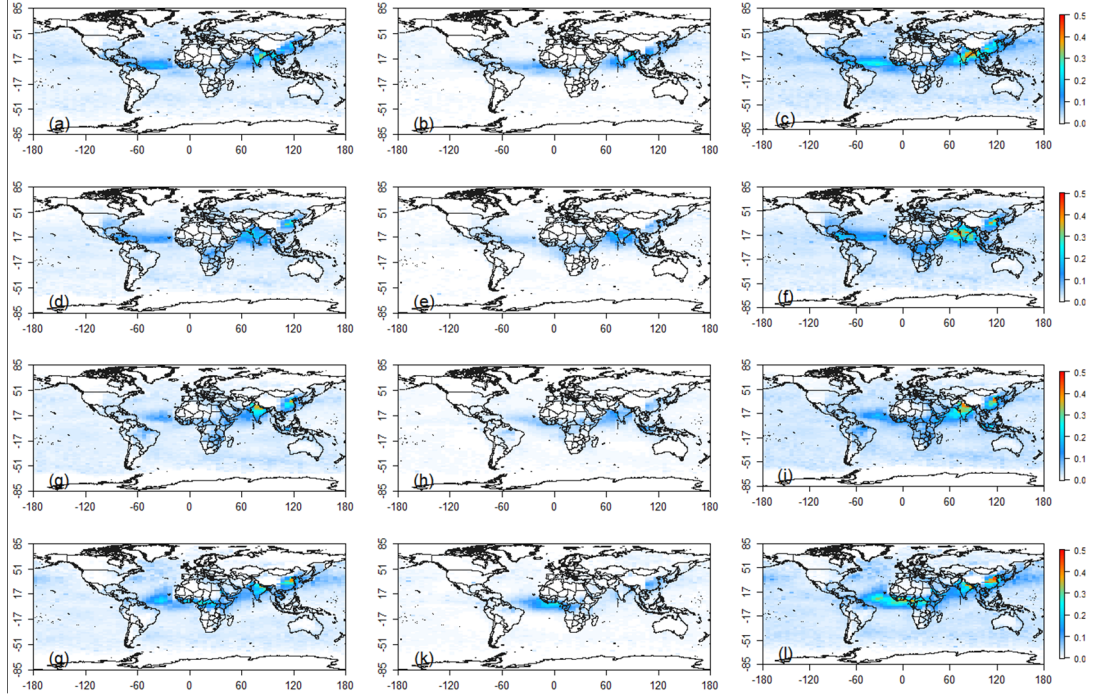

**Figure S7.** Seasonal layered AOD values for polluted dust aerosols. The four rows represent four seasons, which are MAM, JJA, SON, and DJF. The three columns are for AOD<sub>PBL</sub>, AOD<sub>FTL</sub>, and AOD<sub>TA</sub>.

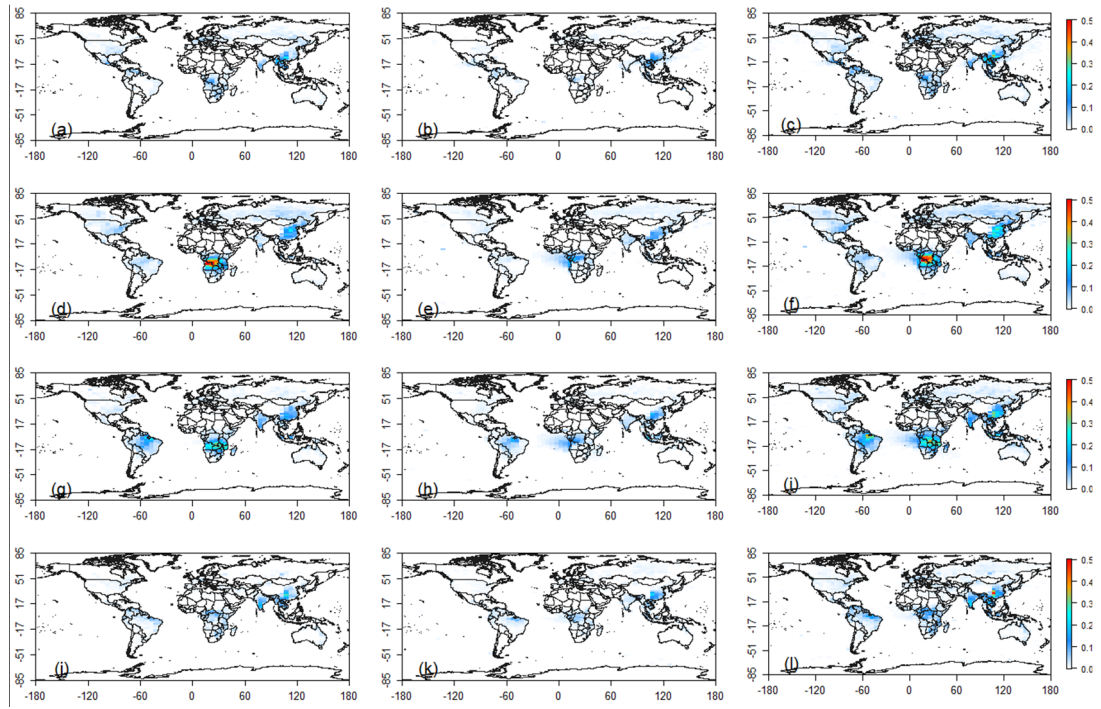

**Figure S8.** Seasonal layered AOD values for smoke aerosols. The four rows represent four seasons, which are MAM, JJA, SON, and DJF. The three columns are for  $AOD_{PBL}$ ,  $AOD_{FTL}$ , and  $AOD_{TA}$ .

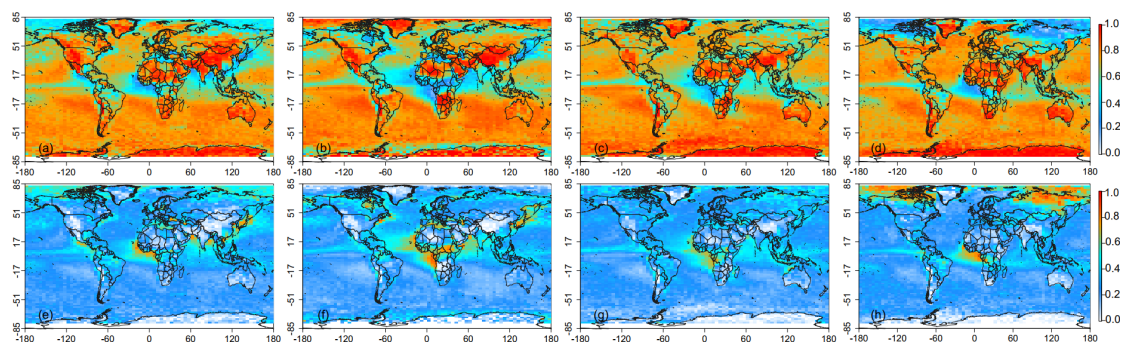

**Figure S9.** (a-d)  $R\_AOD_{PBL}$  values and (e-h)  $R\_AOD_{FTL}$  values in four seasons.

Columns 1-4 correspond to four seasons, which are MAM, JJA, SON, and DJF.

**Table S3.** Summary of the R\_AOD<sub>PBL</sub> values over the land.

|     | Mean | Min. | 1st Qu. | Median | 3rd Qu. | Max.  |
|-----|------|------|---------|--------|---------|-------|
| MAM | 74.1 | 28.7 | 65.0    | 75.3   | 84.8    | 100.0 |
| JJA | 71.6 | 14.8 | 62.2    | 73.1   | 82.3    | 100.0 |
| SON | 71.6 | 25.0 | 62.9    | 71.2   | 80.9    | 100.0 |
| DJF | 65.4 | 8.0  | 53.0    | 69.2   | 80.8    | 100.0 |

**Table S4.** Summary of the R\_AOD<sub>PBL</sub> values over the ocean

|     | mean | Min. | 1st Qu. | median | 3rd Qu. | Max.  |
|-----|------|------|---------|--------|---------|-------|
| MAM | 71.0 | 18.9 | 66.4    | 74.5   | 78.3    | 90.6  |
| JJA | 71.3 | 14.2 | 65.2    | 75.5   | 80.1    | 90.9  |
| SON | 73.1 | 27.5 | 69.0    | 74.9   | 79.7    | 96.9  |
| DJF | 76.1 | 13.8 | 70.6    | 75.6   | 79.1    | 100.0 |

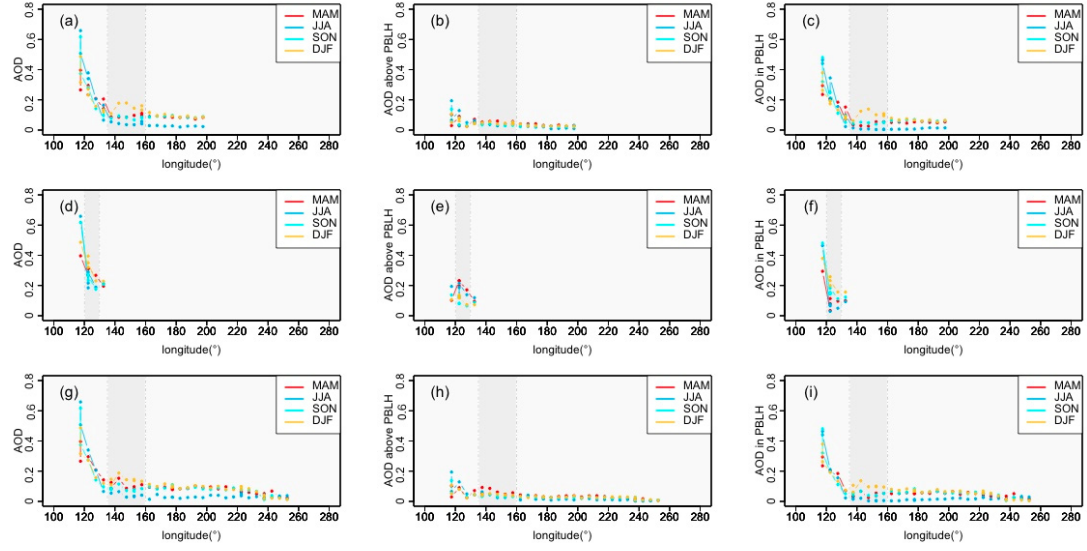

**Figure S10.** (a, d, g)  $AOD_{TA}$ , (b, e, h)  $AOD_{FTL}$ , and (c, f, i)  $AOD_{PBL}$  along three long-distance aerosol transport pathways (CN1, CN2, and CN3) on a seasonal scale (from the North China Plain).

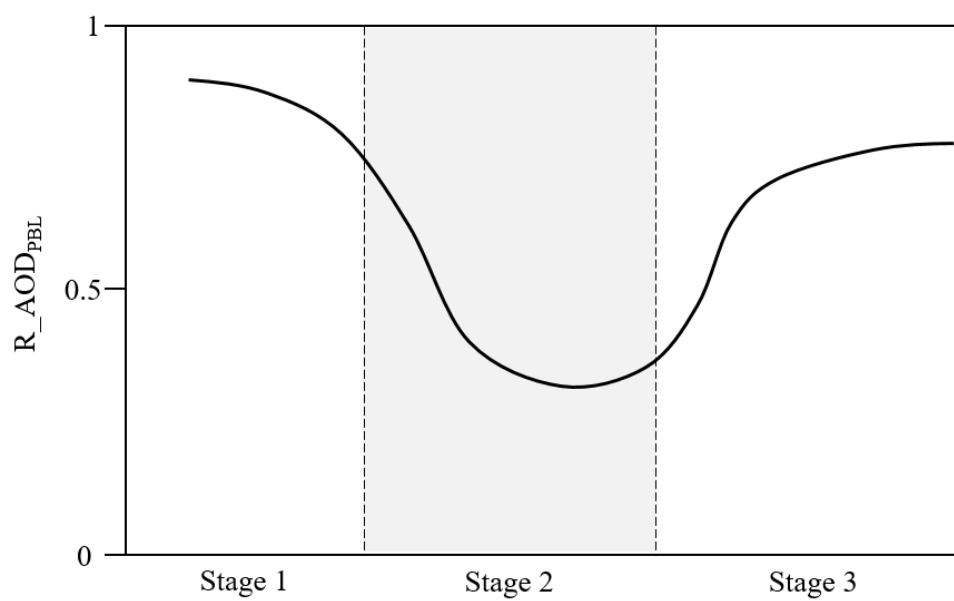

**Figure S11.** Three-stage conceptual model depicting the changes of  $R_{AOD_{PBL}}$  in long-range aerosol transportation

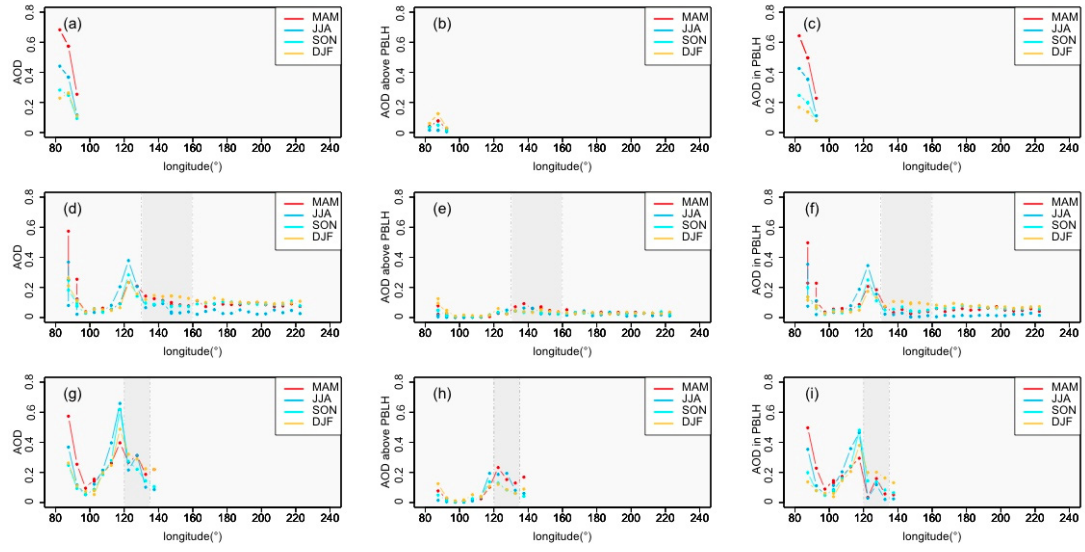

**Figure S12.** (a, d, g) AOD<sub>TA</sub>, (b, e, h) AOD<sub>FTL</sub>, and (c, f, i) AOD<sub>PBL</sub> along three long-distance aerosol transport pathways on a seasonal scale (from the Taklimakan Desert).
